# Supplementary material
Source: PubMed Central journal article supplement (PMC9419204)
Supplement: NIHMS1830503-supplement-Supplementary_Table.pdf [file NIHMS1830503-supplement-Supplementary_Table.pdf]

**Supplement Table**

| Country                     | Year         | WHO Classification   | Reference and Source                                                                                                                                                                                                                                                                                                                                                                                                                                                                                                                                                                                                                                                                                                                                                                                                                                                                                                                                                       |
|-----------------------------|--------------|----------------------|----------------------------------------------------------------------------------------------------------------------------------------------------------------------------------------------------------------------------------------------------------------------------------------------------------------------------------------------------------------------------------------------------------------------------------------------------------------------------------------------------------------------------------------------------------------------------------------------------------------------------------------------------------------------------------------------------------------------------------------------------------------------------------------------------------------------------------------------------------------------------------------------------------------------------------------------------------------------------|
| 1-Bangladesh                | 2013, 2016   | High Burden          | National Tuberculosis Control Programme Directorate General of Health Services Ministry of Health and Family Welfare of Bangladesh. National Guidelines for the Management of Tuberculosis in Children. 2016.<br><a href="https://www.medbox.org/document/national-guidelines-for-the-management-of-tuberculosis-in-children#GO">https://www.medbox.org/document/national-guidelines-for-the-management-of-tuberculosis-in-children#GO</a> . Last Accessed August 12, 2021.<br>National Tuberculosis Control Programme Directorate General of Health Services Ministry of Health and Family Welfare of Bangladesh. National Guidelines and Operational Manual of Tuberculosis Control Fifth Edition. 2013.<br><a href="https://www.medbox.org/document/national-guidelines-and-operational-manual-for-tuberculosis-control#GO">https://www.medbox.org/document/national-guidelines-and-operational-manual-for-tuberculosis-control#GO</a> . Last Accessed August 12, 2021. |
| 2- Brazil                   | 2019         | High Burden          | Ministerio da Saude, Secretaria de Vigilancia em Saude, Departamento de Vigilancia das Doencas Transmissiveis. Manual de Recomendações para O Controle da Tuberculose No Brasil. 2019. <a href="http://www.aids.gov.br/pt-br/pub/2019/manual-de-recomendacoes-para-o-controle-da-tuberculose-no-brasil">http://www.aids.gov.br/pt-br/pub/2019/manual-de-recomendacoes-para-o-controle-da-tuberculose-no-brasil</a> . Last Accessed August 12, 2021.                                                                                                                                                                                                                                                                                                                                                                                                                                                                                                                        |
| 3- Cambodia                 | 2008         | Global TB watch list | National Center for Tuberculosis and Leprosy Control, Ministry of Health of the Kingdom of Cambodia. National Guidelines for Diagnosis and Treatment of TB in Children. 2008.<br><a href="http://www.cenat.gov.kh/cenat/sites/default/files/files/documents/files/National%20Guidelines%20for%20Diagnosis%20and%20Treatment%20of%20TB%20in%20children%20%28English%20Version%29%202008.pdf">http://www.cenat.gov.kh/cenat/sites/default/files/files/documents/files/National%20Guidelines%20for%20Diagnosis%20and%20Treatment%20of%20TB%20in%20children%20%28English%20Version%29%202008.pdf</a> . Last Accessed August 12, 2021.                                                                                                                                                                                                                                                                                                                                          |
| 4- Central African Republic | 2021 (draft) | High Burden          | Programme National de Lutte contre la Tuberculose, Ministere de la Sante et de la Population, Republique Centrafricaine. Guide de Prise en Charge de la Tuberculose de L'enfante. 2021. Personal Communication                                                                                                                                                                                                                                                                                                                                                                                                                                                                                                                                                                                                                                                                                                                                                             |
| 5- China                    | 2018, 2020   | High Burden          | The Chinese Center for Disease Control and Prevention. Guidelines for Prevention and Control of Tuberculosis in Chinese Schools. 2020.<br><a href="https://www.cma.org.cn/module/download/download.jsp?classid=0&amp;filename=c7d4eddb10664d6ea3b0aed33ae6f856.pdf">https://www.cma.org.cn/module/download/download.jsp?classid=0&amp;filename=c7d4eddb10664d6ea3b0aed33ae6f856.pdf</a> . Last Accessed August 12, 2021.<br>中华医学会, 中华医学会杂志社, 中华医学会全科医学分会, 中华医学会呼吸病学分会感染学组, 中华医学会《中华全科医师杂志》编辑委员会, 呼吸系统疾病基层诊疗指南编写专家组. Guidelines for Primary Care of Pulmonary Tuberculosis. Chinese Journal of General Practitioners 2019 August;18(8):709-717.<br><a href="http://tb.chinacdc.cn/xxjlg/201912/P020191204651893563356.pdf">http://tb.chinacdc.cn/xxjlg/201912/P020191204651893563356.pdf</a> . Last Accessed August 12, 2021.                                                                                                                                               |
| 6- DPR Korea                | 2019         | High Burden          | Manual for Pediatric TB Management. 2019. Personal Communication                                                                                                                                                                                                                                                                                                                                                                                                                                                                                                                                                                                                                                                                                                                                                                                                                                                                                                           |
| 7- DR Congo                 | 2015         | High Burden          | Republique Democratique du Congo Ministere de la Sante. Guide de Prise en Charge de la Tuberculose. 2015 .<br><a href="https://www.medbox.org/document/guide-de-prise-en-charge-de-la-tuberculose-pati-5#GO">https://www.medbox.org/document/guide-de-prise-en-charge-de-la-tuberculose-pati-5#GO</a> . Last Accessed August 12, 2021.                                                                                                                                                                                                                                                                                                                                                                                                                                                                                                                                                                                                                                     |

|                |              |             |                                                                                                                                                                                                                                                                                                                                                                                                                                                                                                                                                                                                              |
|----------------|--------------|-------------|--------------------------------------------------------------------------------------------------------------------------------------------------------------------------------------------------------------------------------------------------------------------------------------------------------------------------------------------------------------------------------------------------------------------------------------------------------------------------------------------------------------------------------------------------------------------------------------------------------------|
| 8- Ethiopia    | 2017         | High Burden | Federal Democratic Republic of Ethiopia Ministry of Health. Guidelines for Management of TB, DR-TB and Leprosy in Ethiopia. Sixth Edition Addis Ababa. 2017.<br><a href="https://www.afro.who.int/publications/national-guidelines-tb-drug-resistant-tb-and-leprosy-ethiopia-sixth-edition">https://www.afro.who.int/publications/national-guidelines-tb-drug-resistant-tb-and-leprosy-ethiopia-sixth-edition</a> . Last Accessed August 12, 2021.                                                                                                                                                           |
| 9- India       | 2016, 2021   | High Burden | Central TB Division, Directorate General of Health Services, Ministry of Health and Family welfare. Technical and Operational Guidelines for Tuberculosis Control in India. 2016.<br>Central TB Division, Directorate General of Health Services, Ministry of Health and Family welfare. Guidelines for Programmatic Management of Drug Resistant Tuberculosis in India. 2021.<br><a href="https://tbcindia.gov.in/index1.php?lang=1&amp;level=1&amp;sublinkid=4571&amp;lid=3176">https://tbcindia.gov.in/index1.php?lang=1&amp;level=1&amp;sublinkid=4571&amp;lid=3176</a> . Last Accessed August 12, 2021. |
| 10-Indonesia   | 2016         | High Burden | General Directorate of Disease Prevention and Control, Ministry of Health of the Republic of Indonesia. Technical Guidance on the Management of Childhood Tuberculosis. 2016.<br><a href="https://tbindonesia.or.id/pustaka/pedoman/petunjuk-teknis-manajemen-dan-tatalaksana-tb-anak/">https://tbindonesia.or.id/pustaka/pedoman/petunjuk-teknis-manajemen-dan-tatalaksana-tb-anak/</a> . Last Accessed August 12, 2021.                                                                                                                                                                                    |
| 11- Kenya      | 2017         | High Burden | National Tuberculosis, Leprosy And Lung Disease Program Ministry Of Health Of The Republic Of Kenya. National Guidelines On Management Of Tuberculosis In Children. 2017.<br><a href="https://www.medbox.org/document/national-guidelines-on-management-of-tuberculosis-in-children-3rd-ed#GO">https://www.medbox.org/document/national-guidelines-on-management-of-tuberculosis-in-children-3rd-ed#GO</a> . Last Accessed August 12, 2021.                                                                                                                                                                  |
| 12- Lesotho    | 2016 (draft) | High Burden | Kingdom of Lesotho National Tuberculosis Programme Policy and Manual. 2016 Draft<br><a href="https://www.medbox.org/document/lesotho-national-tuberculosis-programme#GO">https://www.medbox.org/document/lesotho-national-tuberculosis-programme#GO</a> . Last Accessed August 12, 2021.                                                                                                                                                                                                                                                                                                                     |
| 13-Mongolia    | 2017         | High Burden | National Center for Infectious Diseases, Ministry of Health of Mongolia. Management and Organization of Tuberculosis Care Services. 2017.<br><a href="https://mohs.gov.mn/uploads/files/306.pdf">https://mohs.gov.mn/uploads/files/306.pdf</a> . Last Accessed August 12, 2021.                                                                                                                                                                                                                                                                                                                              |
| 14- Mozambique | 2013         | High Burden | República de Moçambique Ministério da Saúde Direcção Nacional de Saúde Pública Programa Nacional de Controlo da Tuberculose. Manual de Tuberculose Infantil em Moçambique . 2013.<br><a href="http://gard-cplp.ihmt.unl.pt/Documentos/Paises/Mocambique/Manual_tuberculose_Infantil_2013_Mocambique.pdf">http://gard-cplp.ihmt.unl.pt/Documentos/Paises/Mocambique/Manual_tuberculose_Infantil_2013_Mocambique.pdf</a> . Last Accessed August 12, 2021.                                                                                                                                                      |
| 15-Myanmar     | 2016         | High Burden | National Tuberculosis Programme and Senior Paediatricians, Myanmar. Revised National Guidelines on Management of Tuberculosis in Children. 2016.<br><a href="https://mohs.gov.mm/page/6662">https://mohs.gov.mm/page/6662</a> . Last Accessed August 12, 2021.                                                                                                                                                                                                                                                                                                                                               |
| 16- Namibia    | 2019         | High Burden | Republic of Namibia Ministry of Health and Social Services. National Guidelines for the Management of Tuberculosis, Fourth Edition. 2019.<br><a href="https://www.namhivociety.org/media/hivsoc/Pdf/National-Guidelines-for-the-Management-of-Tuberculosis-Fourth-Edition-2019.pdf">https://www.namhivociety.org/media/hivsoc/Pdf/National-Guidelines-for-the-Management-of-Tuberculosis-Fourth-Edition-2019.pdf</a> . Last Accessed August 12, 2021.                                                                                                                                                        |

|                  |              |                      |                                                                                                                                                                                                                                                                                                                                                                                                                                                                                                                                                                                                                                                                                                                                                                                                                                                                                                                        |
|------------------|--------------|----------------------|------------------------------------------------------------------------------------------------------------------------------------------------------------------------------------------------------------------------------------------------------------------------------------------------------------------------------------------------------------------------------------------------------------------------------------------------------------------------------------------------------------------------------------------------------------------------------------------------------------------------------------------------------------------------------------------------------------------------------------------------------------------------------------------------------------------------------------------------------------------------------------------------------------------------|
| 17- Nigeria      | 2016, 2019   | High Burden          | <p>Department of Public Health. National Tuberculosis and Leprosy Control Programme, Federal Ministry Of Health Of Nigeria. Childhood Tuberculosis Desk Guide for Diagnosis and Management of Childhood Tuberculosis in Nigeria. 2016. <a href="http://ntblcp.org.ng/resources/childhood-tb-desk-guide">http://ntblcp.org.ng/resources/childhood-tb-desk-guide</a>. Last Accessed August 12, 2021.</p> <p>National Tuberculosis, Leprosy and Buruli Ulcer Control Programme, Department of Public Health of the Federal Ministry of Health of the Federal Republic of Nigeria. National Guidelines for Programmatic Management of Latent TB Infection. 2019. <a href="http://ntblcp.org.ng/resources/national-guidelines-programmatic-management-latent-tb-infection-2020">http://ntblcp.org.ng/resources/national-guidelines-programmatic-management-latent-tb-infection-2020</a>. Last Accessed August 12, 2021.</p> |
| 18- Pakistan     | 2019         | High Burden          | <p>National Tuberculosis Control Program Ministry of National Health Services, Regulation and Coordination, Government of Pakistan. National Guidelines for the Control of Tuberculosis in Pakistan. 2019 Revised. <a href="http://ntp.gov.pk/ntp-old/uploads/National_Guidelines_for_TB_Revised_2019.pdf">http://ntp.gov.pk/ntp-old/uploads/National_Guidelines_for_TB_Revised_2019.pdf</a>. Last Accessed August 12, 2021.</p>                                                                                                                                                                                                                                                                                                                                                                                                                                                                                       |
| 19- Philippines  | 2020         | High Burden          | <p>National Tuberculosis Control Program, Department of Health of the Philippines. Manual of Procedures 6th Edition. 2020. <a href="https://ntp.doh.gov.ph/resources/downloads/publications/">https://ntp.doh.gov.ph/resources/downloads/publications/</a>. Last Accessed August 12, 2021.</p>                                                                                                                                                                                                                                                                                                                                                                                                                                                                                                                                                                                                                         |
| 20- PNG          | 2017         | High Burden          | <p>National Department of Health, Papua New Guinea. Papua New Guinea National Tuberculosis Management Protocol. 2017. Personal Communication.</p>                                                                                                                                                                                                                                                                                                                                                                                                                                                                                                                                                                                                                                                                                                                                                                      |
| 21- Russia       | 2021 (draft) | Global TB watch list | <p>Russian Society of Phthisiologists. Clinical Guidelines for Tuberculosis in Children. 2021 <a href="http://www.roftb.ru/structure/">http://www.roftb.ru/structure/</a>. Last Accessed August 12, 2021.</p>                                                                                                                                                                                                                                                                                                                                                                                                                                                                                                                                                                                                                                                                                                          |
| 22- South Africa | 2013, 2014   | High Burden          | <p>National Department of Health, Republic of South Africa. National Tuberculosis Management Guidelines. 2014. <a href="https://www.medbox.org/document/south-africa-national-tuberculosis-management-guidelines-2014#GO">https://www.medbox.org/document/south-africa-national-tuberculosis-management-guidelines-2014#GO</a>. Last Accessed August 12, 2021.</p> <p>National Department of Health, Republic of South Africa. Guidelines for the Management of Tuberculosis in Children. 2013. <a href="https://www.medbox.org/document/guidelines-for-the-management-of-tuberculosis-in-children-2013#GO">https://www.medbox.org/document/guidelines-for-the-management-of-tuberculosis-in-children-2013#GO</a>. Last Accessed August 12, 2021.</p>                                                                                                                                                                  |
| 23- Tanzania     | 2016         | High Burden          | <p>National Tuberculosis And Leprosy Programme. The ministry of Health, Community Development, Gender, Elderly and Children of the United Republic of Tanzania. National Guidelines for the Management of Tuberculosis in Children. 2016. <a href="https://ntlp.go.tz/site/assets/files/1047/pdf_final_draft_ped_guideline_02_05_2017.pdf">https://ntlp.go.tz/site/assets/files/1047/pdf_final_draft_ped_guideline_02_05_2017.pdf</a>. Last Accessed August 12, 2021.</p>                                                                                                                                                                                                                                                                                                                                                                                                                                              |
| 24- Thailand     | 2018         | High Burden          | <p>Division of Tuberculosis, Department of Disease Control, Ministry of Public Health. National Tuberculosis Control Programme Guidelines. 2018. <a href="https://online.anyflip.com/kqmza/apoy/mobile/index.html">https://online.anyflip.com/kqmza/apoy/mobile/index.html</a>. Last Accessed August 12, 2021.</p>                                                                                                                                                                                                                                                                                                                                                                                                                                                                                                                                                                                                     |
| 25- Uganda       | 2017         | High Burden          | <p>Uganda National Tuberculosis and Leprosy Control Programme. Manual for Management and Control of Tuberculosis and Leprosy, 3rd Edition. 2017. <a href="https://www.tbdiat.org/resources/publications/manual-for-management-and-control-of-tuberculosis-and-leprosy-in-uganda-3rd-edition/">https://www.tbdiat.org/resources/publications/manual-for-management-and-control-of-tuberculosis-and-leprosy-in-uganda-3rd-edition/</a>. Last Accessed August 12, 2021.</p>                                                                                                                                                                                                                                                                                                                                                                                                                                               |
| 26- Vietnam      | 2018         | High Burden          | <p>Ministry of Health of the Socialist Republic of Vietnam. Guidelines for Diagnosis, Treatment and Disease Prevention of Tuberculosis. 2018. <a href="http://kcb.vn/wp-content/uploads/2018/05/Q%C4%90-ban-h%C3%A0nh-H%C6%B0%E1%BB%9Bng-d%E1%BA%ABn-C%C4%90-%C4%90T-DP-b%E1%BB%87nh-lao.pdf">http://kcb.vn/wp-content/uploads/2018/05/Q%C4%90-ban-h%C3%A0nh-H%C6%B0%E1%BB%9Bng-d%E1%BA%ABn-C%C4%90-%C4%90T-DP-b%E1%BB%87nh-lao.pdf</a>. Last Accessed August 12, 2021.</p>                                                                                                                                                                                                                                                                                                                                                                                                                                            |

|              |            |                      |                                                                                                                                                                                                                                                                                                                                                                                                                                                                                                                                                                                                                                                                                                                                                                                                                                                       |
|--------------|------------|----------------------|-------------------------------------------------------------------------------------------------------------------------------------------------------------------------------------------------------------------------------------------------------------------------------------------------------------------------------------------------------------------------------------------------------------------------------------------------------------------------------------------------------------------------------------------------------------------------------------------------------------------------------------------------------------------------------------------------------------------------------------------------------------------------------------------------------------------------------------------------------|
| 27- Zambia   | 2016       | High Burden          | Republic of Zambia National TB/Leprosy Control. Program Guidelines For Management Of Tuberculosis In Children First Edition. 2016 January. Personal Communication                                                                                                                                                                                                                                                                                                                                                                                                                                                                                                                                                                                                                                                                                     |
| 28- Zimbabwe | 2015       | Global TB watch list | Ministry of Health and Child Care of Zimbabwe. Desk-Guide for Management of TB in Children for Healthcare Workers. 2015. <a href="https://www.challengetb.org/publications/tools/country/Desk_Guide_Management_TB_Children_Zimbabwe.pdf">https://www.challengetb.org/publications/tools/country/Desk_Guide_Management_TB_Children_Zimbabwe.pdf</a> . Last Accessed August 12, 2021.                                                                                                                                                                                                                                                                                                                                                                                                                                                                   |
| 29- WHO      | 2014, 2020 | N/A                  | World Health Organization. WHO Consolidated Guidelines on Tuberculosis. Module 1: Prevention – Tuberculosis Preventive Treatment. 2020; Available at: <a href="https://apps.who.int/iris/bitstream/handle/10665/331170/9789240001503-eng.pdf">https://apps.who.int/iris/bitstream/handle/10665/331170/9789240001503-eng.pdf</a> . Last Accessed August 12, 2021.<br>World Health Organization. Guidance for National Tuberculosis Programmes on the Management of Tuberculosis in Children Second Edition. 2014; Available at: <a href="http://apps.who.int/iris/bitstream/handle/10665/112360/9789241548748_eng.pdf;jsessionid=54E8252017BDD95975ED2EA58771A1DA?sequence=1">http://apps.who.int/iris/bitstream/handle/10665/112360/9789241548748_eng.pdf;jsessionid=54E8252017BDD95975ED2EA58771A1DA?sequence=1</a> . Last Accessed August 12, 2021. |
